# Supplementary material for: A study of the asymmetry of ligands in bis(trichlorosilyl)tert-butylphosphine, PBut(SiCl3)2: molecular structure by gas-phase electron diffraction and ab initio calculations
Source: Royal Society of Chemistry journal article supplement (doi:10.1039/b204823j), 2002-01-01
Supplement: b204823j.doc [file b204823j.doc]

**Table S1** Theoretical geometrical parameters (HF/6-31G*) for the *C*1 and *C*s molecular structures of PBut(SiH3)2, PBut(SiH3)(SiCl3), PBut(SiCl3)2.a

|  | PBut(SiH3)2 | PBut(SiH3)(SiCl3) (A)b | PBut(SiH3)(SiCl3) (B)b | PBut(SiCl3)2 | PBut(SiCl3)2 |
| --- | --- | --- | --- | --- | --- |
| Geometrical parameter | HF/6-31G* / *C*1 | HF/6-31G* / *C*1 | HF/6-31G* / *C*1 | HF/6-31G* / *C*1 | HF/6-31G* / *C*s |
| P-C | 190.8 | 191.1 | 191.1 | 191.9 | 192.6 |
| C-C (mean) | 153.7 | 153.7 | 153.7 | 153.7 | 154.5 |
| P-Si(7) | 226.0 | 227.3 | 227.4 | 226.0 | 226.5 |
| P-Si(8) | 225.9 | 223.9 | 223.7 | 225.8 | 226.5 |
| C-H (mean) | 108.5 | 108.5 | 108.5 | 108.4 | 108.4 |
| Si-H (mean) | 147.6 | 147.2 | 147.2 | - | - |
| Si-Cl (mean) | - | 205.5 | 205.5 | 204.7 | 204.7 |
| P-C(1)-C(2) | 107.1 | 106.6 | 105.4 | 106.2 | 116.3 |
| P-C(1)-C(4) | 114.6 | 115.1 | 114.6 | 114.9 | 106.6 |
| P-C(1)-C(5) | 107.8 | 107.5 | 109.3 | 108.1 | 106.6 |
| C-C-C (mean) | 109.0 | 109.1 | 109.1 | 109.1 | 109.0 |
| H-C-H (mean) | 107.9 | 107.8 | 107.9 | 107.8 | 107.6 |
| C-P-Si(7) | 106.8 | 106.8 | 106.7 | 109.5 | 109.0 |
| C-P-Si(8) | 107.0 | 109.6 | 109.5 | 108.7 | 109.0 |
| Si(7)-P-Si(8) | 100.4 | 100.7 | 102.3 | 104.2 | 106.2 |
| P-Si(7)-X(17)c | 114.8 | 113.3 | 114.1 | 116.4 | 108.7 |
| P-Si(7)-X(19) | 109.4 | 107.1 | 107.4 | 108.4 | 116.7 |
| P-Si(7)-X(21) | 106.6 | 107.5 | 106.4 | 109.7 | 109.9 |
| P-Si(8)-Y(18)c | 114.7 | 116.9 | 117.7 | 116.9 | 108.7 |
| P-Si(8)-Y(20) | 106.3 | 107.1 | 107.0 | 109.3 | 116.7 |
| P-Si(8)-Y(22) | 109.9 | 111.8 | 111.0 | 108.3 | 109.9 |
| C-P-Si(7)-X(17) | 63.1 | 39.8 | 69.8 | 74.0 | -67.9 |
| C-P-Si(8)-Y(18) | -45.9 | -67.8 | -44.8 | -40.7 | 67.9 |
| Absolute energyd | -1078.7541 | -2455.6228 | -2455.6226 | -3832.4832 | -3832.4730 |

a All distances in pm, angles in degrees.

b L = All ligands twisted clockwise by ~ 15 – 20, R = All ligands twisted anti-clockwise by ~ 15 – 20

c X and Y = H or Cl

d Energy in Hartrees.

**Table S2** Calculated geometric parameters (*r*a structure) for PBut(SiH3)2 and the two conformers of PBut(SiH3)(SiCl3) (distances in pm, angles in ) at the MP2(fc)/6-31G* level.

| Geometrical Parameter | PBut(SiH3)2 | PBut(SiH3)(SiCl3) (A)a | PBut(SiH3)(SiCl3) (B)a |
| --- | --- | --- | --- |
| P-C | 190.2 | 190.4 | 190.4 |
| C-C (mean) | 153.1 | 153.2 | 153.2 |
| P-Si(7) | 224.9 | 226.2 | 226.3 |
| P-Si(8) | 224.7 | 222.2 | 221.9 |
| C-H (mean) | 109.4 | 109.5 | 109.5 |
| Si-H (mean) | 148.7 | 148.3 | 148.4 |
| Si-Cl (mean) | - | 205.3 | 205.3 |
| P-C(1)-C(2) | 106.5 | 106.1 | 105.0 |
| P-C(1)-C(4) | 114.7 | 115.2 | 114.7 |
| P-C(1)-C(5) | 107.4 | 106.8 | 108.4 |
| C-C-C (mean) | 109.4 | 109.5 | 109.5 |
| H-C-H (mean) | 109.4 | 109.4 | 109.4 |
| C-P-Si(7) | 104.6 | 105.0 | 105.1 |
| C-P-Si(8) | 104.8 | 107.4 | 107.4 |
| Si(7)-P-Si(8) | 98.4 | 97.8 | 99.7 |
| P-Si(7)-X(17)b | 114.9 | 113.4 | 114.4 |
| P-Si(7)-X(19) | 107.1 | 107.2 | 107.5 |
| P-Si(7)-X(21) | 109.0 | 107.6 | 106.2 |
| P-Si(8)-Y(18)b | 114.7 | 116.8 | 118.0 |
| P-Si(8)-Y(20) | 106.5 | 106.8 | 106.5 |
| P-Si(8)-Y(22) | 110.0 | 111.3 | 110.6 |
| C-P-Si(7)-X(17) | 66.3 | 35.4 | 71.2 |
| C-P-Si(8)-Y(18) | -41.6 | -68.0 | -42.2 |
| Absolute energyc | -1079.5562 | -2456.8140 | -2456.8137 |

a L = All ligands twisted anti-clockwise by ~ 15-20, R = All ligands twisted clockwise by ~ 15 - 20.

b X and Y = H or Cl.

c Energy in Hartrees.

**Table S3** Experimental coordinates for PBut(SiCl3)2 from the GED analysis.

| Atom | *x* | *y* | *z* |
| --- | --- | --- | --- |
| C(1) | 1.9059 | 0.0000 | 0.0000 |
| C(2) | 2.3348 | 1.5047 | 0.0000 |
| H(3) | 2.0015 | 2.0353 | -0.9389 |
| C(4) | 2.5691 | -0.7383 | -1.2095 |
| C(5) | 2.3887 | -0.6400 | 1.3436 |
| P(6) | 0.0000 | 0.0000 | 0.0000 |
| Si(7) | -0.5717 | 0.1111 | -2.1320 |
| Si(8) | -0.5522 | -2.0953 | 0.4352 |
| H(9) | 1.8918 | 2.0665 | 0.8730 |
| H(10) | 3.4557 | 1.6207 | 0.0658 |
| H(11) | 3.6942 | -0.6487 | -1.1891 |
| H(12) | 3.5130 | -0.7320 | 1.3836 |
| H(13) | 2.3246 | -1.8403 | -1.2128 |
| H(14) | 1.9662 | -1.6765 | 1.4894 |
| H(15) | 2.2213 | -0.3189 | -2.1981 |
| H(16) | 2.0746 | -0.0256 | 2.2369 |
| Cl(17) | -0.1543 | -1.5239 | -3.2639 |
| Cl(18) | 0.5991 | -3.5552 | -0.3845 |
| Cl(19) | -2.5696 | 0.4729 | -2.2128 |
| Cl(20) | -2.4446 | -2.3587 | -0.2567 |
| Cl(21) | 0.3424 | 1.7079 | -2.9943 |
| Cl(22) | -0.5517 | -2.3855 | 2.4463 |
